# Supplementary material for: A long noncoding RNA sensitizes genotoxic treatment by attenuating ATM activation and homologous recombination repair in cancers
Source: PLoS Biol. 2020 Mar 23;18(3):e3000666. doi: 10.1371/journal.pbio.3000666 (PMC7138317; doi:10.1371/journal.pbio.3000666)
Supplement: S1 Data — From Figs 1A–1G, 2A, 2D, 2E, 3B, 3E–3G, 3I, 3J, 4A, 4C–4E, 5A–5G and 6B–6E. (XLSX) [file pbio.3000666.s008.xlsx]

## Sheet: fig.1A
		Test.1	Test.2	Test.3	Average	SD	SEM
	untreated	1	1	1	1	0	0
	DMSO	1.34891	1.14851	0.715605	1.07101	0.323689	0.186882
	Dox	4.29848	4.59769	4.37094	4.42237	0.156096	0.090122
	Eto	2.64982	3.35406	2.93805	2.98064	0.354044	0.204408
	Bleo	2.54324	1.69249	1.59375	1.94316	0.522025	0.301392
	CLA	4.38038	5.35878	4.31039	4.68318	0.586129	0.338402
	TNFα+CHX	0.937367	1.06545	0.924305	0.975707	0.0779929	0.0450292
	taxol	0.838265	1.0707	0.685676	0.864881	0.193888	0.111941
		Test.1	Test.2	Test.3	Average	SD	SEM
	untreated	0.015	0.0142857	0.0146977	0.0146611	0.000358545	0.000207006
	DMSO	0.0165289	0.0166667	0.016255	0.0164835	0.000209577	0.000121
	Dox	0.232558	0.25	0.19186	0.224806	0.0298349	0.0172252
	Eto	0.263158	0.354839	0.196289	0.271429	0.0795977	0.0459558
	Bleo	0.322581	0.235294	0.319484	0.292453	0.0495251	0.0285933
	CLA	0.405405	0.413043	0.375996	0.398148	0.0195611	0.0112936
	TNFα+CHX	0.44	0.428571	0.425546	0.431373	0.00762317	0.00440124
	taxol	0.38	0.5	0.43895	0.43965	0.0600031	0.0346428

## Sheet: fig.1B
	Hela
		Test.1	Test.2	Test.3	Average	SD	SEM
	0μg/ml	1	1	1	1	0	0
	0.5μg/ml	1.77978	1.81227	1.42531	1.67245	0.214647	0.123926
	1μg/ml	3.4107	3.5013	3.53255	3.48152	0.0632861	0.0365382
	2μg/ml	5.07806	5.08133	4.93349	5.03096	0.0844257	0.0487432
	4μg/ml	7.3272	7.87331	8.50191	7.90081	0.587836	0.339387
	HCT116	Test.1	Test.2	Test.3	Average	SD	SEM
	0μg/ml	1	1	1	1	0	0
	0.5μg/ml	2.06748	1.58336	1.62358	1.75814	0.268647	0.155103
	1μg/ml	2.35619	2.02047	2.19714	2.19127	0.167933	0.0969564
	2μg/ml	3.32166	4.17516	3.72341	3.74007	0.426993	0.246525
	4μg/ml	4.78988	4.7035	4.70196	4.73178	0.0503209	0.0290528

## Sheet: fig.1C
	hela
		0h	1h	2h	6h	24h
	Test.1	1	1.55	4.02	2.99	2.6
	Test.2	1	1.83	2.71	2.17	3.29
	Test.3	1	1.42	3.45	2.56	3
	Average	1	1.6	3.39333	2.57333	2.96333
	SD	0	0.209523	0.656836	0.410163	0.346458
	SEM	0	0.120968	0.379224	0.236807	0.200028
	HCT116
		0h	1h	2h	6h	24h
	Test.1	1	2.01	3.46	3.15	2.64
	Test.2	1	1.91	3.75	3.55	2.58
	Test.3	1	1.45	3.2	2.37	2.49
	Average	1	1.79	3.47	3.02333	2.57
	SD	0	0.298664	0.275136	0.600111	0.0754983
	SEM	0	0.172434	0.15885	0.346474	0.043589

## Sheet: fig.1D
		vector	HITT
	Test.1	1	7.50577
	Test.2	1	6.78806
	Test.3	1	6.70831
	Average	1	7.00071
	SD	0	0.439207
	SEM	0	0.253576
		vector					HITT
		untreated	Dox	washout 12h	washout 24h		untreated	Dox	washout 12h	washout 24h
	Test.1	3.35483e-05	3.1746	0.23919	0.0033		0.000153572	3.51252	1.3365	0.85498
	Test.2	0.000310727	3.81438	0.439185	0.0042797		0.000269366	2.81209	1.23448	0.82293
	Test.3	0.000100746	3.52183	0.918934	0.000336852		0.000323249	3.43491	1.6153	0.64764
	Average	0.00014834	3.5036	0.532436	0.00263885		0.000248729	3.25317	1.39543	0.775183
	SD	0.000144589	0.320279	0.349335	0.00205289		8.67006e-05	0.383954	0.197132	0.111612
	SEM	8.34784e-05	0.184913	0.201689	0.00118524		5.00566e-05	0.221676	0.113814	0.0644393

## Sheet: fig.1E
		si-Ctl	si-HITT#1	si-HITT#2
	Test.1	1	0.359983	0.380245
	Test.2	1	0.419575	0.412653
	Test.3	1	0.374231	0.426909
	Average	1	0.384596	0.406602
	SD	0	0.031119	0.0239132
	SEM	0	0.0179666	0.0138063
			untreated				Dox				washout 5h				washout 12h
		sictl	siHITT#1	siHITT#2		sictl	siHITT#1	siHITT#2		sictl	siHITT#1	siHITT#2		sictl	siHITT#1	siHITT#2
	Test.1	0.00735174	0.00907014	0.00815103		6.13928	4.0296	5.69661		3.91798	1.46147	2		0.523551	0.15	0.288935
	Test.2	0.00611117	0.00560655	0.00670073		6.59897	6.9712	4.86871		2.75788	1.5	1.6673		0.625141	0.360111	0.329872
	Test.3	0.00334114	0.00310335	0.00422021		5.32514	5.2391	6.82543		3.13985	1.23911	1.28399		0.538908	0.355562	0.302595
	Average	0.00560135	0.00592668	0.00635732		6.02113	5.4133	5.79692		3.2719	1.40019	1.65043		0.562533	0.288558	0.307134
	SD	0.00205333	0.00299625	0.00198778		0.645081	1.47852	0.982209		0.591213	0.140827	0.358302		0.0547611	0.120016	0.0208425
	SEM	0.00118549	0.00172989	0.00114765		0.372438	0.853622	0.567079		0.341337	0.13164	0.206866		0.0316164	0.0692914	0.0120334

## Sheet: fig.1F
										ATMi-1				ATMi-2
		vector	HITT		sictl	siHITT#1	siHITT#2		sictl	siHITT#1	siHITT#2		sictl	siHITT#1	siHITT#2
	Test.1	1	0.62117		1	1.65854	1.69512		0.353468	0.288591	0.344519		0.463415	0.402439	0.317073
	Test.2	1	0.685446		1	1.59756	1.52439		0.373494	0.361446	0.477912		0.371951	0.414634	0.420732
	Test.3	1	0.652582		1	1.39024	1.79268		0.306488	0.263982	0.302013		0.426829	0.390244	0.378049
	Average	1	0.653066		1	1.54878	1.67073		0.344483	0.304673	0.374815		0.420732	0.402439	0.371951
	SD	0	0.0321408		0	0.140641	0.135799		0.0343948	0.050683	0.0917792		0.0460356	0.0121951	0.0520976
	SEM	0	0.0185565		0	0.0811991	0.0784037		0.0198578	0.0292619	0.0529887		0.0265787	0.00704086	0.0300786

## Sheet: fig.1G
	EJ2
		vector	HITT	sictl	siHITT#1	siHITT#2
	Test.1	1	1.2	1	1.05	1.09
	Test.2	1	1.24	1	1.02	1.07
	Test.3	1	1.05	1	0.69	0.72
	Average	1	1.16333	1	0.92	0.96
	SD	0	0.100167	0	0.19975	0.208087
	SEM	0	0.0578312	0	0.115326	0.120139
	EJ5
		vector	HITT	sictl	siHITT#1	siHITT#2
	Test.1	1	0.78	1	0.83	1.14
	Test.2	1	1.2	1	1.03	1.1
	Test.3	1	0.98	1	0.87	0.75
	Average	1	0.986667	1	0.91	0.996667
	SD	0	0.210079	0	0.10583	0.214554
	SEM	0	0.121289	0	0.061101	0.123873

## Sheet: fig.2A
				washout
		Dox		DMSO		ATMi-1		ATMi-2
		vector	HITT	vector	HITT	vector	HITT	vector	HITT
	Test.1	8.26763	7.61613	1.41781	5.04415	6.19658	5.06095	6.92827	6.95243
	Test.2	7.62815	7.95822	1.68152	3.76856	6.22466	5.6765	7.34136	7.3422
	Test.3	5.99928	6.35181	0.615733	3.02115	4.51299	4.93222	6.12954	6.18858
	Average	7.29835	7.30872	1.23835	3.94462	5.64474	5.22322	6.79972	6.82774
	SD	1.16958	0.846178	0.555094	1.02293	0.980229	0.397794	0.616051	0.586835
	SEM	0.67526	0.488541	0.320484	0.590588	0.565935	0.229667	0.355677	0.338809

## Sheet: fig.2D
		vector							HITT
		0min	5min	10min	30min	120min	360min		0min	5min	10min	30min	120min	360min
	Test.1	1	1.1225	1.99227	2.80944	4.56877	4.99737		0.948276	1.07809	1.28702	1.76623	1.97228	1.99222
	Test.2	1	1.16767	1.84701	2.9532	4.34749	4.66544		0.981969	0.998688	1.20407	1.51283	2.06085	2.24261
	Test.3	1	1.17218	1.73093	2.75246	3.6037	3.79781		0.955583	0.960256	1.01767	1.54557	1.76004	1.83118
	Average	1	1.15412	1.85673	2.83837	4.17332	4.48687		0.961943	1.01235	1.16959	1.60821	1.93106	2.022
	SD	0	0.0274738	0.130941	0.103447	0.50556	0.619392		0.0177242	0.0600941	0.137946	0.137823	0.154581	0.207328
	SEM	0	0.015862	0.075599	0.059725	0.291885	0.357606		0.0102331	0.0346954	0.0796432	0.079572	0.0892475	0.119701

## Sheet: fig.2E
		sictl						siHITT
		0	5min	30min	60min	360min		0	5min	30min	60min	360min
	Test.1	1	0.521241	1.41312	3.35347	3.56394		0.726103	0.800382	3.71612	4.70661	4.45086
	Test.2	1	1.68733	1.95908	3.65377	3.15608		1.12608	1.18448	3.01216	5.82475	4.7676
	Test.3	1	1.33115	1.5526	3.41178	2.96995		0.886591	1.10346	3.10543	4.89725	4.72613
	Average	1	1.17991	1.6416	3.47301	3.22999		0.912924	1.02944	3.27791	5.14287	4.6482
	SD	0	0.597578	0.283652	0.159237	0.303813		0.201284	0.202465	0.382361	0.598172	0.172153
	SEM	0	0.345012	0.163767	0.0919353	0.175407		0.116211	0.116893	0.220756	0.345355	0.0993928

[truncated: 21 more sheets: fig.3B, fig.3E, fig.3F, fig.3G, fig.3I, fig.3J, fig.4A, fig.4C, fig.4D, fig.4E, fig.5A, fig.5B, fig.5C, fig.5D, fig.5E, fig.5F, fig.5G, fig.6B, fig.6C, fig.6D …]
